# Supplementary material for: Exploring access to health and social supports for intimate partner violence (IPV) survivors during stressful life events (SLEs)—A scoping review
Source: PubMed Central journal article supplement (PMC11611170; doi:10.1371/journal.pone.0313613), 2024-12-02
Supplement: pone.0313613.s002.pdf [file pone.0313613.s002.pdf]

## Supplement 1:

### MEDLINE (OVID) Preliminary Search Strategy

1. Battered Women/
2. domestic violence/ or spouse abuse/ or gender-based violence/ or intimate partner violence/ or family violence/
3. ((wife or wives or wom#n) adj3 batter\*).ti,ab,kf.
4. ((violen\* or abus\*) adj3 (partner\* or wom#n or spous\* or wife or wives or marital or marriage\*)).ti,ab,kf.
5. ((domestic\* or home\*) adj3 (violen\* or abus\*)).ti,ab,kf.
6. ((relation\* or interperson\*) adj3 (abuse\* or violen\*)).ti,ab,kf.
7. (violen\* adj3 (date\* or dating)).ti,ab,kf.
8. (date\* adj3 rape\*).ti,ab,kf.
9. ((domestic\* or marital or partner\* or spous\*) adj3 rape\*).ti,ab,kf.
10. ((domestic\* or marital or partner\* or spous\*) adj3 (sex\* adj1 (abuse\* or assault\*))).ti,ab,kf.
11. (gender-based adj3 (violen\* or abus\*)).ti,ab,kf.
12. or/1-11
13. stressful life events/ disease outbreaks/ or epidemics/ or pandemics/
14. COVID-19/ or exp COVID-19 Testing/ or COVID-19 Vaccines/ or SARS-CoV-2/
15. coronavirus/ or betacoronavirus/ or coronavirus infections/
16. (disease\* adj3 outbreak\*).ti,ab,kf.
17. (pandemic\* or epidemic\*).ti,ab,kf.
18. ((new or novel or "19" or "2019" or Wuhan or Hubei or China or Chinese) adj3 (coronavirus\* or corona virus\* or betacoronavirus\* or CoV or HCoV)).ti,ab,kf,ot.
19. (nCoV\* or 2019nCoV or 19nCoV or COVID19\* or COVID or SARS-COV-2 or SARSCOV-2 or SARS-COV2 or SARSCOV2 or SARS coronavirus 2 or Severe Acute Respiratory Syndrome Coronavirus 2 or Severe Acute Respiratory Syndrome Corona Virus 2).ti,ab,kf,nm,ot,ox,rx,px.
20. (longCOVID\* or postCOVID\* or postcoronavirus\* or postSARS\*).ti,ab,kf,ot.
21. (coronavirus\* or corona virus\* or betacoronavirus\*).ti,ab,kf,ot.
22. ((Wuhan or Hubei) adj5 pneumonia).ti,ab,kf,ot.
23. Economic Recession/
24. Natural disaster/ or environmental disaster/
25. (flood\* or earthquake\* or tsunami\* or tornado\* or hurricane\* or cyclone\* or wildfire\* or landslide\* or drought\* or avalanche\* or heat wave\* or volcan\* or blizzard\* or fire\* or ice storm\*).ti,ab,kf.
26. recession\*.ti,ab,kf.
27. (econom\* adj3 (depression\* or uncertainty or downturn\*)).ti,ab,kf.
28. or/13-26
29. health services accessibility/ or health equity/
30. social support/ or community support/ or psychosocial support systems/ or Friends/ or community
31. help-seeking behavior/
32. (health adj3 (service\* or care\*) adj3 (access\* or inaccessib\* or unreachable\* or unattainab\* or reach\* or equit\* or inequit\* or use\* or using or seek\*)).ti,ab,kf.
33. (healthcare\* adj3 (access\* or inaccessib\* or unreachable\* or unattainab\* or reach\* or equit\* or inequit\* or use\* or using or seek\*)).ti,ab,kf.
34. (support\* adj3 (access\* or inaccessib\* or unreachable\* or unattainab\* or reach\* or equit\* or inequit\* or use\* or using or seek\*)).ti,ab,kf.f

35. ((help\* or assistanc\*) adj3 (access\* or inaccessib\* or unreachable\* or unattainab\* or reach\* or equit\* or inequit\* or use\* or using or seek\*)).ti,ab,kf.
36. ((famil\* or neighbo?r\* or relative\* or friend\*) adj3 (access\* or inaccessib\* or unreachable\* or unattainab\* or reach\* or equit\* or inequit\* or use\* or using or seek\*)).ti,ab,kf.
37. (shelter\* adj3 (access\* or inaccessib\* or unreachable\* or unattainab\* or reach\* or equit\* or inequit\* or use\* or using or seek\*)).ti,ab,kf.
38. or/28-36
39. 12 and 27 and 37
