# Supplementary material for: Exploring access to health and social supports for intimate partner violence (IPV) survivors during stressful life events (SLEs)—A scoping review
Source: PubMed Central journal article supplement (PMC11611170; doi:10.1371/journal.pone.0313613), 2024-12-02
Supplement: pone.0313613.s003.pdf [file pone.0313613.s003.pdf]

## Supplement 2 - Extraction Tool

### PREVIEW

General information

### Study ID

Please enter DOI/URL link if available.

### Title

Title of paper / abstract / report that data are extracted from

### Lead author contact details

### Notes

Characteristics of included studies

Methods

### Aim of study

Please enter stated aim/purpose/objectives of study.

***Key question: What is known in published literature about access to services by individuals who experience IPV during stressful life events in high-income countries?  
- looking from perspectives of IPV survivors, support services providers & informal supports (family, friends, neighbours)***

Link to the protocol: <https://journals.plos.org/plosone/article?id=10.1371/journal.pone.0277903>

### Study design

Please click on which one you think best describes study design. Ignore the Sys. Review or Text/Opinion, those were pre-populated.

1. Randomised controlled trial
2. Non-randomised experimental study
3. Cohort study
4. Cross sectional study
5. Case control study
6. Systematic review
7. Qualitative research
8. Prevalence study
9. Case series
10. Case report
11. Diagnostic test accuracy study
12. Clinical prediction rule
13. Economic evaluation
14. Text and opinion
15. Other

**Start date**

**End date**

**Geography (country, region etc.)**

**Study funding sources**

Please enter funding source and if none state "None to report"

**Possible conflicts of interest for study authors**

Please enter any stated conflict of interest and if none, state "None to report".

**Type of Stressful Life Event**

1. COVID-19/pandemic
2. Natural disaster (hurricane, flood, earthquake)
3. Economic recession
4. Other

**Participants Characteristics**

**Participant type (check all that apply)**

Please indicate if the paper is from perspective of IPV survivors or supports providers (at this point don't worry about informal/formal etc.) it will be captured in the description below.

1. Survivors of IPV
2. Service/support providers
3. Both IPV and support providers (informal or formal)
4. Other

**Type of supports (formal/informal) being accessed/provided**

Please indicate types of supports being accessed. Specify if formal or informal and , where possible, what the support was.

For example:

- Formal (i.e. social service providers, violence against women (VAW) services, criminal justice, health professionals, religious organizations)

-Informal (i.e., friends, relatives, neighbours)

**Population description (additional information)**

Is there additional information to add about sample description and size?

Information about sub-groups at higher risk (i.e., refugees, immigrants).

**Sample Size of Participants**

Please enter the total sample size and, if applicable, the disaggregated gender information. If possible, please add the average/mean age if reported.

|                                 | Survivors of IPV | Service Providers |
|---------------------------------|------------------|-------------------|
| total sample size               |                  |                   |
| average/mean age of sample size |                  |                   |
| number of women                 |                  |                   |
| average/mean age of women       |                  |                   |
| number of men                   |                  |                   |
| average mean age of men         |                  |                   |
| Other                           |                  |                   |

**Inclusion/Exclusion criteria**

Please indicate any inclusion or exclusion criteria state in the study (i.e., just women, refugees, age groups, etc.). If none stated, leave blank.

**Method of recruitment of participants**

1. Phone
2. Mail
3. Clinic patients
4. Voluntary
5. Other

**Method of data collection**

1. Interviews
2. Focus groups
3. Survey/questionnaire
4. Other

Results and outcomes  
  
Qualitative/descriptive

**Key themes that emerged from qualitative analysis**

**Barriers**

Please list barriers to accessing services during SLEs. Please indicate if there were sub-groups at higher risk.

**Facilitators**

Please list facilitators to accessing services during SLEs.

**Lessons Learned/Recommendations**

Please list any lessons learned/recommendations outlined

Quantitative

**Quantitative results from the study**

In this section, please indicate any key quantitative findings from the study and if significant where possible:

Examples:

- Survivors of IPV: use of IPV tool (screening, support, information) before and after if possible & significant finding; #s reached; evaluations of actual tools/approaches to provide services (if applicable).

- Service providers: 43.9% of participants (support service providers) used telephone as main remote support communication medium; % who used medium before and after stressful event (i.e., pandemic, earthquake, flood). If there was a pre/post, what the finding is and if significant.

**Additional information**

Please add anything else you think is pertinent and not covered in above
